# Supplementary material for: Halogeno-substituted indazoles against copper corrosion in industrial pickling process: a combined electrochemical, morphological and theoretical approach
Source: Royal Society of Chemistry journal article supplement (doi:10.1039/c8ra08238c), 2018-01-01
Supplement: c8ra08238c1.pdf [file c8ra08238c1.pdf]

## Supplementary Data

### **Halogeno-substituted indazoles against copper corrosion in industrial pickling process: A combined electrochemical, morphological and theoretical approach**

Yujie Qiang,<sup>a</sup> Shengtao Zhang,<sup>\*a</sup> Qin Xiang<sup>a</sup>, Bochuan Tan<sup>a</sup>, Wenpo Li,<sup>\*a</sup> Shijin Chen<sup>b</sup> and Lei Guo<sup>c</sup>

<sup>a</sup> *School of Chemistry and Chemical Engineering, Chongqing University, Chongqing 400044, China*

<sup>b</sup> *Bomin Electronics Ltd., Meizhou 514021, China*

<sup>c</sup> *School of Materials and Chemical Engineering, Tongren University, Tongren 554300, China*

Corresponding author.

*E-mail address:* [stzhang\\_cqu@163.com](mailto:stzhang_cqu@163.com); *Tel:* +86 23 65678934.

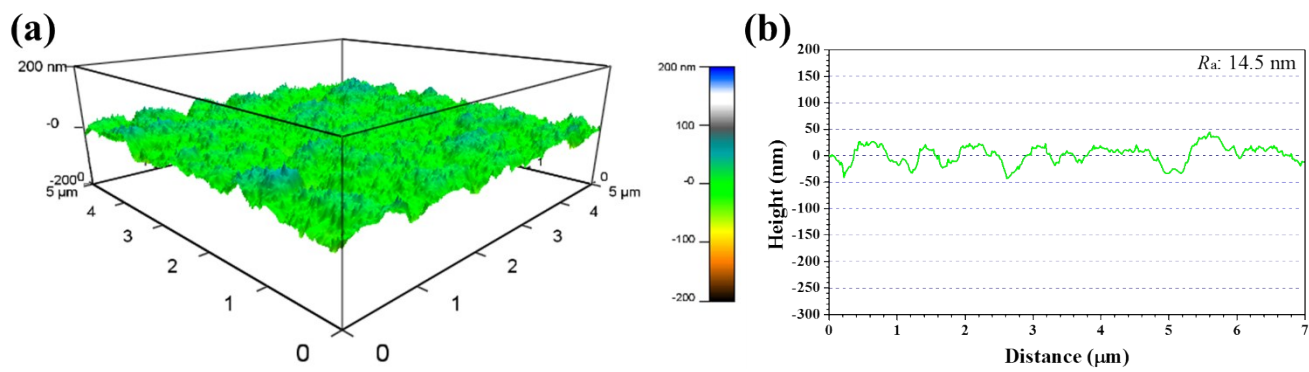

**Figure S1** (a) 3D AFM graph and (b) height profile of copper specimen after immersion in 0.5 M  $\text{H}_2\text{SO}_4$  solution in the presence of 1 mM 4-FIA for 8 h at 298 K.

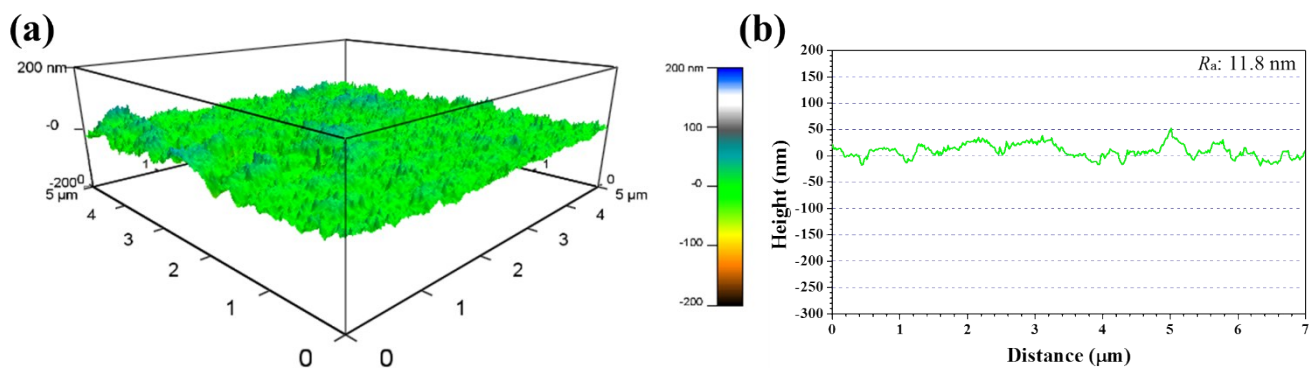

**Figure S2** (a) 3D AFM graph and (b) height profile of copper specimen after immersion in 0.5 M  $\text{H}_2\text{SO}_4$  solution in the presence of 1 mM 4-BIA for 8 h at 298 K.
